# Supplementary material for: Prevalence of paediatric inflammatory bowel disease in Sweden: a nationwide population-based register study
Source: PubMed Central journal article supplement (PMC5282815; doi:10.1186/s12876-017-0578-9), 2017-01-31
Supplement: 12876_2017_578_MOESM1_ESM.pdf [file 12876_2017_578_MOESM1_ESM.pdf]

**Table S1** Summary of paediatric prevalence studies\* – by year of publication

| Author                                                                                 | Year | Country / region               | n             | Age group | Year of data collection | IBD prevalence per 100 000            | CD prevalence per 100 000             | UC prevalence per 100 000             |
|----------------------------------------------------------------------------------------|------|--------------------------------|---------------|-----------|-------------------------|---------------------------------------|---------------------------------------|---------------------------------------|
| <b>Paediatric prevalence studies</b>                                                   |      |                                |               |           |                         |                                       |                                       |                                       |
| Hildebrand et al[1]                                                                    | 1991 | Sweden                         | 333           | <16y      | 1984-1985               | 17.6                                  | 6.2                                   | 7.5                                   |
| Hildebrand et al[2]                                                                    | 1994 | Sweden, Southwestern           | 132           | <16y      | 1983-1987               | 21.5                                  |                                       |                                       |
| Jakobsen et al[3]                                                                      | 2008 | Denmark, Eastern part          | 98;<br>145    | <15y      | 1998-2000;<br>2002-2004 | 15.8;<br>20.3                         | 6.7;<br>8.2                           | 8.3;<br>10.5                          |
| Benchimol et al[4]                                                                     | 2009 | Canada, Ontario                | 3169          | 6m-18y    | 1994–2005               | 58.3                                  | 32.8–36.2 <sup>‡</sup>                | 20.3–22.1 <sup>‡</sup>                |
| Abramson et al[5]                                                                      | 2010 | USA, Northern California       | 675           | <17y      | 1996-2006               |                                       | 12.0                                  | 19.5                                  |
| El-Matary et al[6]                                                                     | 2014 | Canada, one province           |               | <17y      | 1978-2007               | 33.9                                  | 18.9                                  | 12.7                                  |
| Current study                                                                          | 2016 | Sweden                         | 1432;<br>1193 | <18y      | 1993-2010               | Cumulative: 75<br>Treated in 2010: 62 | Cumulative: 29<br>Treated in 2010: 23 | Cumulative: 30<br>Treated in 2010: 25 |
| <b>Overall prevalence studies reporting paediatric prevalence estimates separately</b> |      |                                |               |           |                         |                                       |                                       |                                       |
| Kappelman et al[7]                                                                     | 2013 | USA, four census regions       |               | <20y      | 2008-2009               |                                       | 58                                    | 34                                    |
| Loftus et al[8]                                                                        | 2007 | USA, Olmsted County, Minnesota | 81            | <20y      | 1940-2000               |                                       | 114.9                                 | 106.7                                 |
| Bernstein et al[9]                                                                     | 2006 | Canada, 5 provinces            |               | <20y      | 1998-2000               |                                       | 30.5 (MB) - 71.1 (AB)                 | 17.5 (BC) - 30.7 (AB)                 |
| Current study                                                                          | 2016 | Sweden                         |               | <20y      | 1993-2010               | 105                                   | 40                                    | 43                                    |

IBD = inflammatory bowel disease; CD = Crohn's disease; UC = ulcerative colitis; AB = Alberta; MB = Manitoba; BC = British Columbia

\* Publications presenting only overall prevalence estimates for entire populations (both adult and paediatric) or with focus on adults only were excluded; Comparison of results is hampered by differences in data collection techniques, case ascertainment (e.g. ICD10, diagnostic criteria of Lennard-Jones, histologic classification described by Morson and Dawson and Yardley and Donowitz), IBD definition (e.g. IBD defined as UC+CD+probable CD+IC (Hildebrand et al 1991); IBD defined as UC+CD+IC excl. infectious or other specific underlying enteritis or colitis (Jakobsen et al 2008), IBD defined as UC+CD plus parts of unclassifiable patients)), and measurements; In the paper by Bernstein et al (2006) the province abbreviations represent: British Columbia (BC), Alberta (AB), and Manitoba (MB).

‡ The lower number in the range represents prevalent cases excluding unclassifiable patients. The upper range of prevalence represents the prevalence including one-third of unclassifiable patients (except in the 6 months–4 years age group, where two-thirds of unclassifiable patients are included as possible cases).

## References to eTable 1

1. Hildebrand H, Fredrikzon B, Holmquist L, Kristiansson B, Lindquist B: **Chronic inflammatory bowel disease in children and adolescents in Sweden.** *J Pediatr Gastroenterol Nutr* 1991, **13**(3):293-297.
2. Hildebrand H, Brydolf M, Holmquist L, Krantz I, Kristiansson B: **Incidence and prevalence of inflammatory bowel disease in children in south-western Sweden.** *Acta Paediatr* 1994, **83**(6):640-645.
3. Jakobsen C, Wewer V, Urne F, Andersen J, Faerk J, Kramer I, Stagegaard B, Pilgaard B, Weile B, Paerregaard A: **Incidence of ulcerative colitis and Crohn's disease in Danish children: Still rising or levelling out?** *Journal of Crohn's & colitis* 2008, **2**(2):152-157.
4. Benchimol EI, Guttman A, Griffiths AM, Rabeneck L, Mack DR, Brill H, Howard J, Guan J, To T: **Increasing incidence of paediatric inflammatory bowel disease in Ontario, Canada: evidence from health administrative data.** *Gut* 2009, **58**(11):1490-1497.
5. Abramson O, Durant M, Mow W, Finley A, Kodali P, Wong A, Tavares V, McCroskey E, Liu L, Lewis JD *et al*: **Incidence, prevalence, and time trends of pediatric inflammatory bowel disease in Northern California, 1996 to 2006.** *J Pediatr* 2010, **157**(2):233-239 e231.
6. El-Matary W, Moroz SP, Bernstein CN: **Inflammatory bowel disease in children of Manitoba: 30 years' experience of a tertiary center.** *J Pediatr Gastroenterol Nutr* 2014, **59**(6):763-766.
7. Kappelman MD, Moore KR, Allen JK, Cook SF: **Recent trends in the prevalence of Crohn's disease and ulcerative colitis in a commercially insured US population.** *Dig Dis Sci* 2013, **58**(2):519-525.
8. Loftus EV, Jr.: **The burden of inflammatory bowel disease in the United States: a moving target?** *Clin Gastroenterol Hepatol* 2007, **5**(12):1383-1384.
9. Bernstein CN, Wajda A, Svenson LW, MacKenzie A, Koehoorn M, Jackson M, Fedorak R, Israel D, Blanchard JF: **The epidemiology of inflammatory bowel disease in Canada: a population-based study.** *Am J Gastroenterol* 2006, **101**(7):1559-1568.
