# Supplementary material for: Prevalence of paediatric inflammatory bowel disease in Sweden: a nationwide population-based register study
Source: PubMed Central journal article supplement (PMC5282815; doi:10.1186/s12876-017-0578-9), 2017-01-31
Supplement: 12876_2017_578_MOESM2_ESM.pdf [file 12876_2017_578_MOESM2_ESM.pdf]

**eTable 2** Summary of ICD codes used for ulcerative colitis and Crohn's disease

|                           | <b>ICD9 (1987-1996)</b> | <b>ICD10 (since 1997)</b> |
|---------------------------|-------------------------|---------------------------|
| <b>Crohn's disease</b>    | 555                     | K50                       |
| <b>Ulcerative colitis</b> | 556                     | K51                       |
