# Supplementary material for: Prevalence of paediatric inflammatory bowel disease in Sweden: a nationwide population-based register study
Source: PubMed Central journal article supplement (PMC5282815; doi:10.1186/s12876-017-0578-9), 2017-01-31
Supplement: 12876_2017_578_MOESM3_ESM.pdf [file 12876_2017_578_MOESM3_ESM.pdf]

**eTable 3** Summary of surgical procedure codes used in the analysis

|                                                           | National classification of procedures (till 1996)             | NOMESCO classification of surgical procedures (since 1997)                                                                  |
|-----------------------------------------------------------|---------------------------------------------------------------|-----------------------------------------------------------------------------------------------------------------------------|
| <b>Total colectomy / Ileostomy</b>                        | 4650- 4654,<br>4700                                           | JFH                                                                                                                         |
| <b>Partial excision of intestine</b>                      | 4630, 4631, 4640-4649                                         | JFB                                                                                                                         |
| <b>Partial excision of rectum</b>                         | 4820- 4828                                                    | JGB                                                                                                                         |
| <b>Minor surgical procedures<br/>e.g. stricturoplasty</b> | 4960, 4740, 4741, 4910, 4611,<br>4010, 4900, 4922, 4970, 4971 | JFA60, JFA38, JFA58, JGA58, JHD00, JFA70,<br>JFA71, JFA80, JFA81, JHD10, JFA76, JFA86,<br>JHA00, JHA20, JHD20, JHD30, JHD33 |
