# Supplementary material for: Prevalence of paediatric inflammatory bowel disease in Sweden: a nationwide population-based register study
Source: PubMed Central journal article supplement (PMC5282815; doi:10.1186/s12876-017-0578-9), 2017-01-31
Supplement: 12876_2017_578_MOESM5_ESM.pdf [file 12876_2017_578_MOESM5_ESM.pdf]

**eTable 5** Summary of codes used for extra-intestinal manifestations / comorbidities

|                                                                                                                                                                                                                                   | <b>ICD9 (1987-1996)</b>                                                           | <b>ICD10 (since 1997)</b>                                                                                               |
|-----------------------------------------------------------------------------------------------------------------------------------------------------------------------------------------------------------------------------------|-----------------------------------------------------------------------------------|-------------------------------------------------------------------------------------------------------------------------|
| <b>Rheumatic / Metabolic</b><br>Incl. rheumatoid arthritis, psoriatic and enteropathic arthropathies, juvenile arthritis, unspecified arthritis, pain in joints, Sjögren's syndrome, Behcet's disease, and ankylosing spondylitis | 268C, 710C, 711C, 713, 714A, 714B, 714C, 714D, 714W, 719D, 720A, 730A, 730C, 733A | M05, M06.0, M06.2, M06.3, M06.8, M06.9, M07, M08, M09, M12.3, M13.9, M25.5, M35.0, M35.2, M45, M80, M83.8, M86.0, M86.9 |
| <b>Dermatologic</b><br>Incl. pyoderma gangraenosum, erythema nodosum, psoriasis, febrile neutrophilic dermatosis, and aphthous stomatitis                                                                                         | 528A, 528B, 528C, 686A, 695C, 696                                                 | K12.0, K12.1, L40, L52, L88, L98.2                                                                                      |
| <b>Hepatobiliary</b><br>Incl. primary sclerosing cholangitis, pericholangitis, cholelithiasis, chronic active hepatitis, and nonalcoholic fatty liver disease                                                                     | 571E, 571W, 573C, 573D, 574, 576B                                                 | K73.2, K75.8, K75.9, K76.0, K80, K83.0                                                                                  |
| <b>Pancreatic</b><br>Incl. acute pancreatitis or other chronic pancreatitis                                                                                                                                                       | 577A, 577B                                                                        | K85, K86.1                                                                                                              |
