# Supplementary material for: Prevalence of paediatric inflammatory bowel disease in Sweden: a nationwide population-based register study
Source: Springer Nature journal article supplement (doi:10.1186/s12876-017-0578-9), 2017-01-31
Supplement: MOESM4 [file 12029880]

**eTable 4** Summary of codes used for medical treatment / prescribed drugs

|                                                             | ATC codes           |
|-------------------------------------------------------------|---------------------|
| <b>Aminosalicylic acid and similar agents</b>               | A07EC               |
| <b>Corticosteroids</b>                                      | A07EA, H02BX, H02AB |
| <b>Immunomodulators (incl. biologics), purine analogues</b> | L04A, L01BB02       |
